# Supplementary material for: Esophageal extracellular matrix hydrogel mitigates metaplastic change in a dog model of Barrett’s esophagus
Source: PubMed Central journal article supplement (PMC7329334; doi:10.1126/sciadv.aba4526), 2020-07-01
Supplement: aba4526_SM.pdf [file aba4526_SM.pdf]

## Supplementary Materials for

### **Esophageal extracellular matrix hydrogel mitigates metaplastic change in a dog model of Barrett's esophagus**

Juan Diego Naranjo, Lindsey T. Saldin, Eric Sobieski, Lina M. Quijano, Ryan C. Hill, Patrick G. Chan, Crisanto Torres, Jenna L. Dziki, Madeline C. Cramer, Yoojin C. Lee, Rohit Das, Anant K. Bajwa, Rania Nossair, Molly Klimak, Lucile Marchal, Shil Patel, Sachin S. Velankar, Kirk C. Hansen, Kevin McGrath, Stephen F. Badylak\*

\*Corresponding author. Email: [badylaks@upmc.edu](mailto:badylaks@upmc.edu)

Published 1 July 2020, *Sci. Adv.* **6**, eaba4526 (2020)  
DOI: 10.1126/sciadv.aba4526

#### **The PDF file includes:**

Figs. S1 to S6  
Legends for tables S1 and S2

#### **Other Supplementary Material for this manuscript includes the following:**

(available at [advances.sciencemag.org/cgi/content/full/6/27/eaba4526/DC1](https://advances.sciencemag.org/cgi/content/full/6/27/eaba4526/DC1))

Tables S1 and S2



## Supplementary Materials:

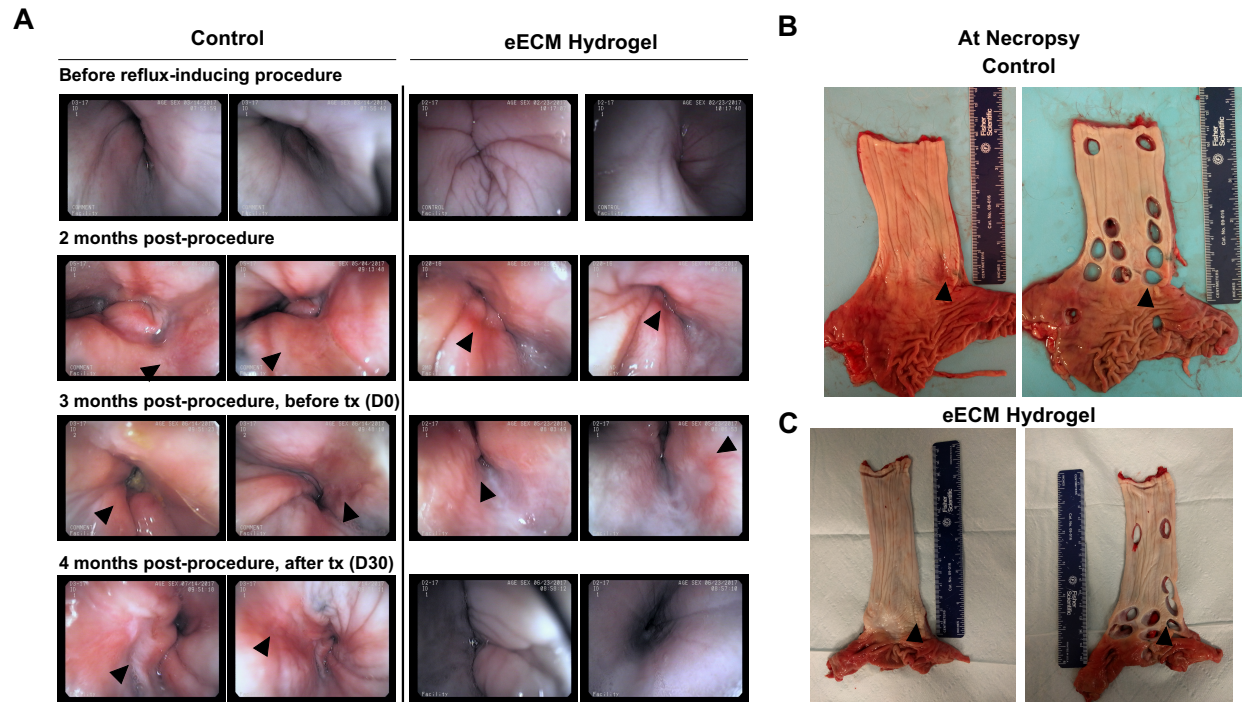

**Fig. S1. Overview of injury progression throughout study for control and treatment animals.**

**(A)** Injury model created macroscopic esophagitis with ulcerations in the lower esophagus on both control and treated animals (up to 3 months). Ulceration remained visible in the control animal after 4 months macroscopically compared to normal esophageal tissue in the eECM hydrogel treated animal at the end of the study. The esophagus was harvested from the animals and opened longitudinally. The entire lower circumference of the esophagus was collected for analysis using 12mm biopsy punches, ensuring that the whole circumference was evaluated. **(B)** Macroscopic evaluation confirmed minor ulceration in the control animal (arrow) and **(C)** normal tissue in the eECM treated animal (arrow). (Photo credit: Juan Diego Naranjo, University of Pittsburgh).

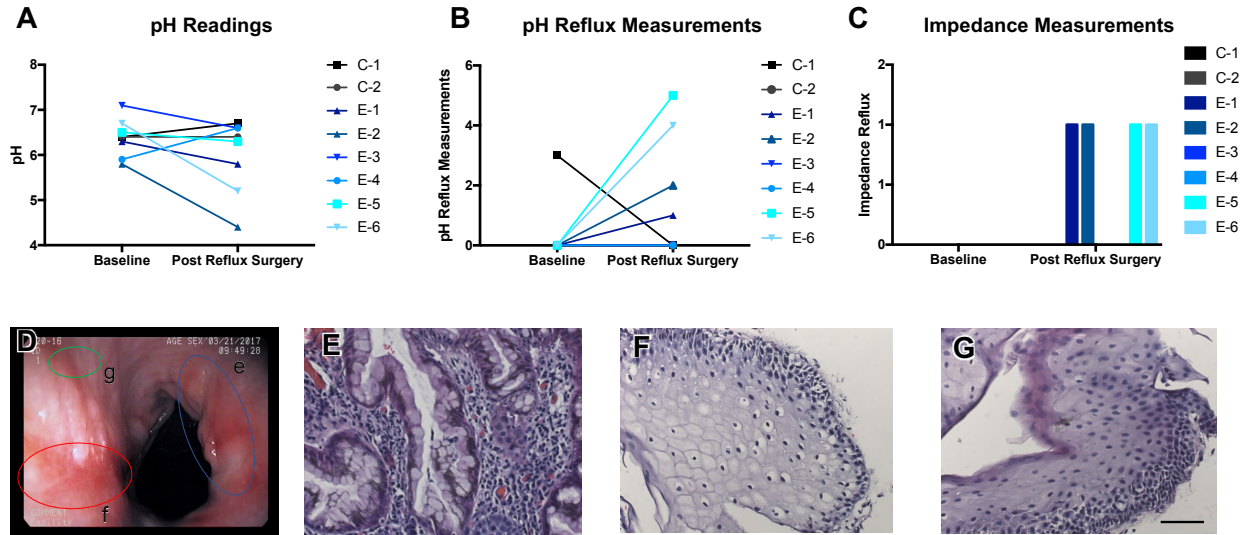

**Fig. S2. Validation of the Barrett's esophagus canine model.** Induction of reflux and columnar metaplasia was confirmed in the canine model of Barrett's esophagus. **(A)** One-hour pH readings were obtained for all animals before ("baseline") and after reflux-inducing surgery. Average pH before the procedure was  $6.4 \pm 0.41$  at baseline and  $6.2 \pm 0.57$  post reflux-inducing surgery. Data are means  $\pm$  SD ( $n=8$ ), with absolute values for each animal shown in the graphs. All animals except E-4 and C-1 had a decrease in pH post reflux-inducing surgery when compared to baseline. **(B)** Reflux events were measured with the pH probe for 1h. One animal (C-1) showed a reflux event pre-operatively at baseline, and 4 animals (E-1, E-2, E-5, and E-6) presented at least one reflux episode as measured by pH. **(C)** No animals had any impedance events at baseline during the 1-hour readings. Four of 8 dogs presented at least one reflux episode as measured by impedance post reflux-inducing surgery (E-1, E-2, E-5, E-6). **(D)** A representative image of the distal esophagus at endoscopy before treatment. Biopsies were taken at an area of (e) esophagitis, (f) defect and (g) normal. (Photo credit: Juan Diego Naranjo, University of Pittsburgh). **(E)** H&E

stained biopsy harvested at area of esophagitis. **(F)** H&E stained biopsy harvested at site of defect. **(G)** Normal tissue stained with H&E. Scale bar= 50  $\mu$ m.

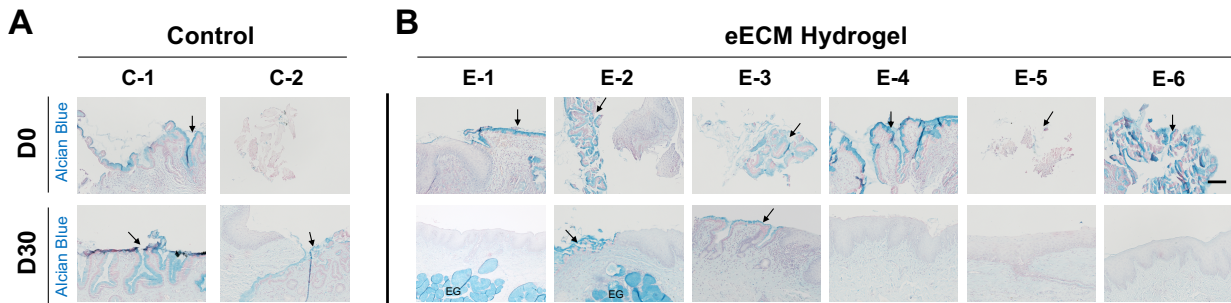

**Fig. S3. Alcian blue staining.** Biopsies were taken before treatment (D0), and location-matched samples were collected after 30 days of treatment (D30) for **(A)** control animals and **(B)** eECM hydrogel treated animals. Samples were stained with alcian blue, which labels the intracytoplasmic acidic mucin of goblet cells. Arrows indicate goblet cells characteristic of intestinal metaplasia and Barrett's esophagus. Non-metaplastic, mucin containing esophageal glands (EG) can also stain positively for alcian blue and are not a marker of Barrett's esophagus. Scale bar = 100  $\mu$ m.

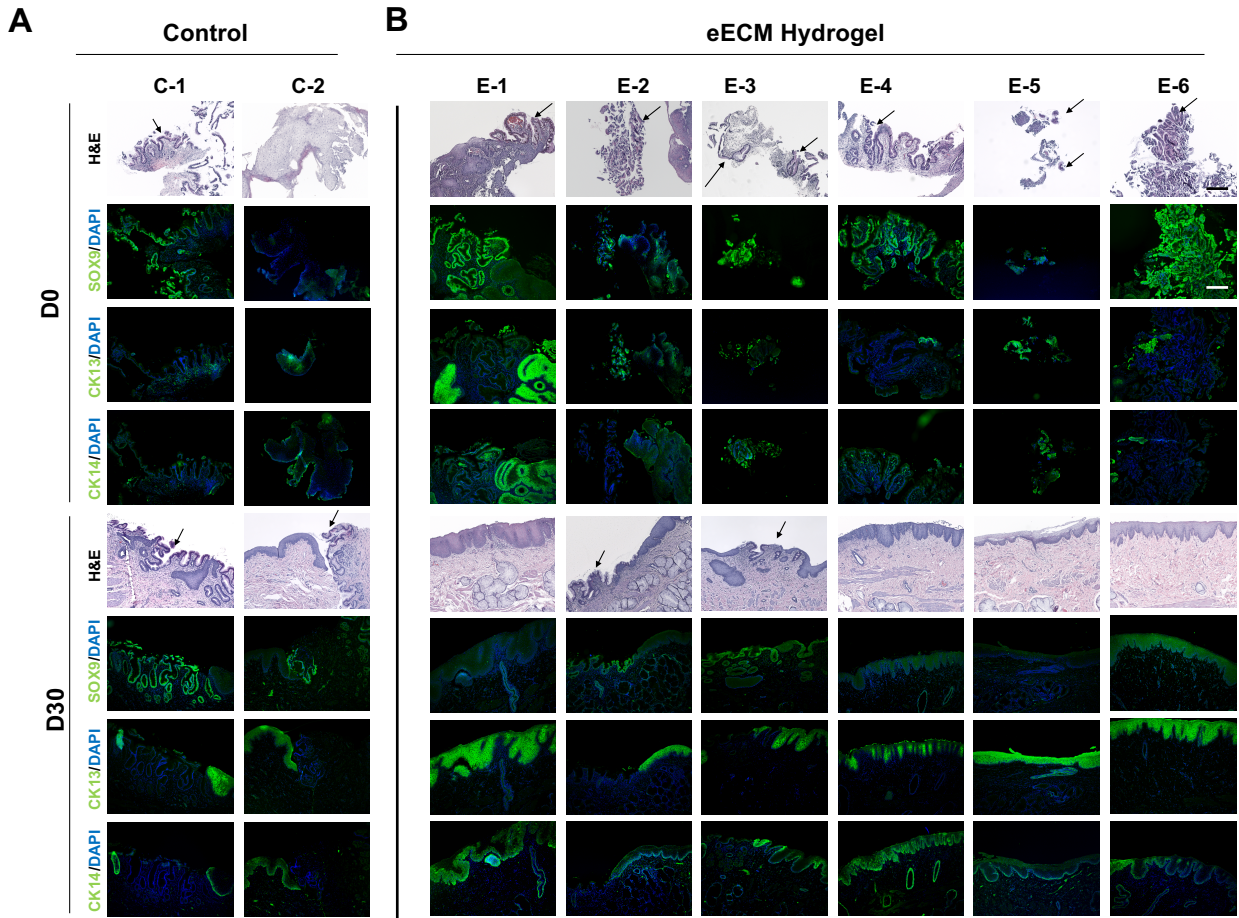

**Fig. S4. Effect of eECM hydrogel treatment on esophageal epithelial cell phenotype after 30 days.** Biopsies were taken before treatment (D0), and location-matched samples were collected after 30 days of treatment (D30) for (A) control animals and (B) eECM hydrogel treated animals. Samples were stained with hematoxylin and eosin (H&E), Barrett’s marker Sox9, or normal esophageal squamous epithelial markers CK13 and CK14. Arrows indicate goblet cells characteristic of intestinal metaplasia and Barrett’s esophagus. Scale bar = 250  $\mu\text{m}$ .



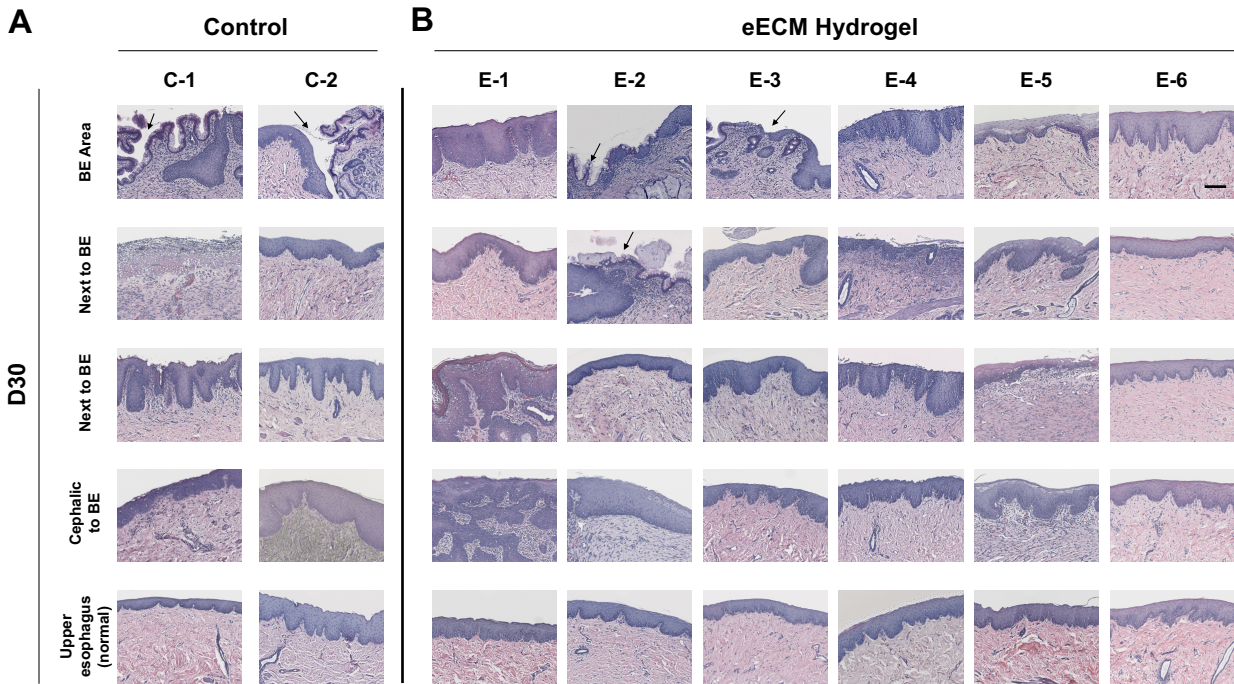

**Fig. S5. Histologic view of the circumference of the distal esophagus.** The entire circumference of the esophagus was collected after 30 days of treatment (D30) for **(A)** control and **(B)** eECM treated animals. Columnar cells were present in the main BE area in C-1, C-2, E-2 and E-3 where a transitional epithelium was seen. The only animal that had a columnar epithelium expanding from the BE area was E-2. Scale bar = 100  $\mu$ m.

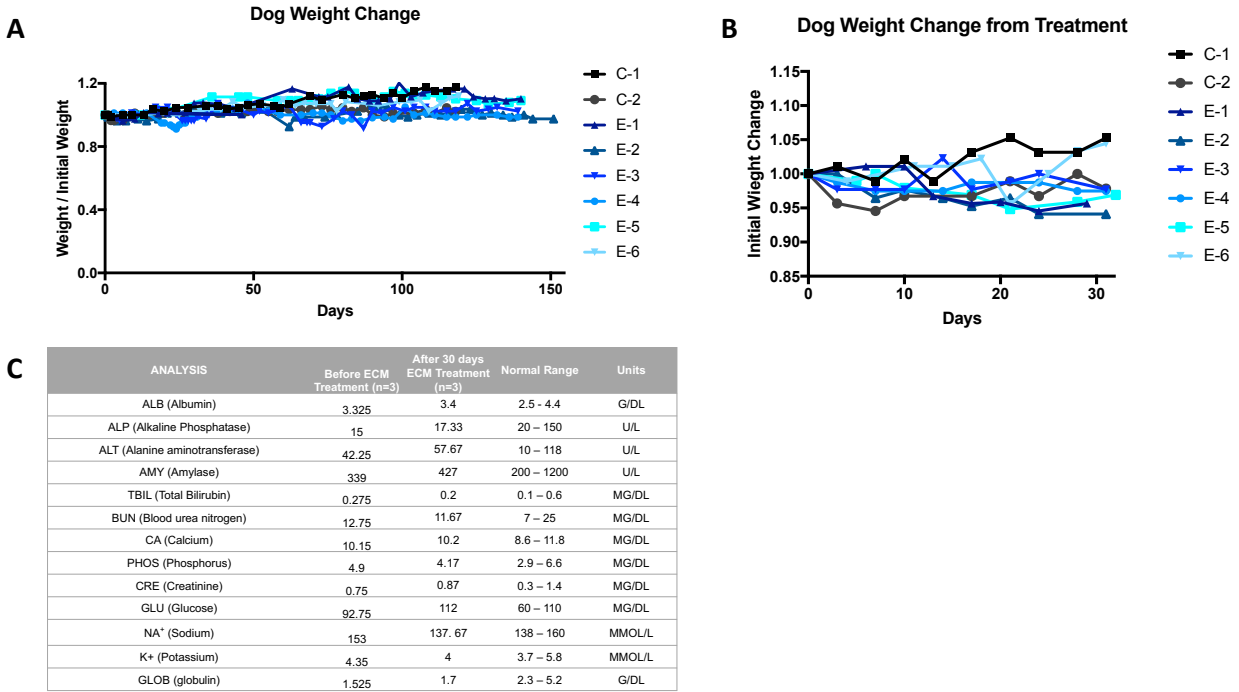

**Fig. S6. Safety of 30 days of eECM administration.** (A) Weight recording for all animals during the period of study. There was no overall weight change with a final weight of  $106.2\% \pm 6.6\%$ . (B) Animal weights during eECM administration. There was no change with a  $98.7\% \pm 3.8\%$  after completing treatment. (C) A veterinary blood scan panel did not show any physiological parameters out of range after treatment (n=3).



| Protein                                                    | GENE      | Uniprot | Gene Ontology Class    | Matrisome      | Protein Abundance as Ratio Distal/Normal |             |             |           |      |      |      |
|------------------------------------------------------------|-----------|---------|------------------------|----------------|------------------------------------------|-------------|-------------|-----------|------|------|------|
|                                                            |           |         |                        |                | C-1                                      | E-1         | E-2         | E-3       | E-4  | E-5  | E-6  |
| Collagen alpha-1(IV) chain(Arresten/Core Protein)          | COL4A1*   | P02462  | Basement Membrane      | Collagen       | 1.30                                     | 1.19        | 1.81        | 2.08      | 1.30 | 1.10 | 1.43 |
| Perlecan(Endorepellin)                                     | HSPG2*    | P98160  | Basement Membrane      | Proteoglycan   | 1.83                                     | 1.73        | 2.24        | 2.35      | 1.23 | 1.54 | 1.50 |
| Nidogen 1/2 (osteonidogen)(Nid1/2)                         | NID1/2*   | Q14112  | Basement Membrane      | Glycoprotein   | 1.43                                     | 2.05        | 2.06        | 2.50      | 1.26 | 1.45 | 2.09 |
| Collagen alpha-1/5(IV) chain(Arresten/Core Protein)        | COL4A1/5* | P02462  | Basement Membrane      | Collagen       | 0.85                                     | 2.01        | 1.51        | 1.89      | 1.51 | 1.39 | 1.37 |
| Collagen alpha-1/5(IV) chain(Arresten/Core Protein)        | COL4A1/5* | P02462  | Basement Membrane      | Collagen       | 0.84                                     | 1.71        | 1.42        | 1.71      | 1.54 | 1.27 | 1.41 |
| Collagen alpha-2(IV) chain(Constatin/Core Protein)         | COL4A2*   | P08572  | Basement Membrane      | Collagen       | 1.40                                     | 1.16        | 1.66        | 2.46      | 1.32 | 1.12 | 1.54 |
| Aggrin                                                     | AGRN      | O00468  | Basement Membrane      | Glycoprotein   | 2.35                                     | 0.98        | 1.55        | 1.47      | 1.01 | 1.25 | 1.70 |
| Collagen alpha-5(IV) chain                                 | COL4A5    | P29400  | Basement Membrane      | Collagen       | 0.38                                     | 4.67        | 2.92        | 2.98      | 0.88 | 1.57 | 1.50 |
| Perlecan                                                   | HSPG2     | P98160  | Basement Membrane      | Proteoglycan   | 1.67                                     | 1.73        | 2.36        | 2.36      | 1.31 | 1.67 | 1.38 |
| Laminin alpha-4                                            | LAMA4     | Q16363  | Basement Membrane      | Glycoprotein   | 1.16                                     | 1.98        | 1.49        | 2.01      | 1.21 | 1.22 | 2.27 |
| Laminin Beta-1                                             | LAMB1     | P07942  | Basement Membrane      | Glycoprotein   | 1.67                                     | 2.11        | 1.11        | 0.91      | 1.10 | 1.03 | 2.00 |
| Laminin Beta-2                                             | LAMB2     | Q61292  | Basement Membrane      | Glycoprotein   | 0.84                                     | 2.88        | 1.77        | 1.91      | 1.23 | 1.32 | 1.63 |
| Laminin Gamma-1                                            | LAMC1     | P11047  | Basement Membrane      | Glycoprotein   | 1.43                                     | 1.61        | 1.63        | 2.26      | 1.12 | 1.27 | 1.69 |
| Nidogen-1                                                  | NID1      | P14543  | Basement Membrane      | Glycoprotein   | 0.88                                     | 1.61        | 2.01        | 3.07      | 1.11 | 1.02 | 3.01 |
| Myosin(Myosin-3,4,6,7)                                     | MYH*      | P12882  | Cytoskeletal           | Cellular       | eECM Only                                | Normal Only | eECM Only   |           |      |      |      |
| Tubulin beta-4B chain(4b & 5 chain)                        | TUBB*     | P04350  | Cytoskeletal           | Cellular       | 1.72                                     | 0.69        | 1.40        | 1.66      | 1.13 | 1.12 | 1.86 |
| Actin (All isoforms)                                       | ACT       | P60709  | Cytoskeletal           | Cellular       | 1.14                                     | 1.17        | 1.68        | 2.13      | 1.13 | 1.10 | 2.05 |
| Actin, cytoplasmic 1/2                                     | ACTB      | P60709  | Cytoskeletal           | Cellular       | 2.53                                     | 0.86        | 1.66        | 2.08      | 1.03 | 1.30 | 2.60 |
| Desmin                                                     | DES       | P17661  | Cytoskeletal           | Cellular       | 0.95                                     | 0.80        | 1.06        | 0.97      | 0.96 | 0.98 | 1.04 |
| Spectrin alpha chain, non-erythrocytic 1                   | SPTA2     | Q13813  | Cytoskeletal           | Cellular       | 1.41                                     | 0.90        | 1.73        | 1.52      | 1.18 | 1.36 | 1.30 |
| Vimentin                                                   | VIM       | P08670  | Cytoskeletal           | Cellular       | 3.07                                     | 0.54        | 2.12        | 2.43      | 1.03 | 1.73 | 2.11 |
| Lysyl oxidase-like 1                                       | LOXL1     | Q08397  | ECM regulator          | ECM regulator  | 2.59                                     | 1.52        | 3.91        | 1.59      | 1.02 | 2.12 | 1.70 |
| Transglutaminase 2                                         | TGM2      | P21980  | ECM regulator          | ECM regulator  |                                          | Normal Only |             |           |      |      |      |
| Annexin A2                                                 | ANXA2     | P07355  | ECM-affiliated         | ECM-affiliated | 1.09                                     | 0.68        | 1.11        | 1.39      | 0.99 | 0.85 | 2.17 |
| Asporin                                                    | ASPN      | Q9BXN1  | ECM-affiliated         | Proteoglycan   | 3.09                                     | 0.82        | 1.88        | 1.85      | 0.84 | 1.96 | 1.94 |
| Extracellular Matrix Protein 1                             | ECM1      | Q62894  | ECM-affiliated         | Glycoprotein   | 0.94                                     | 0.87        | 2.10        | 1.24      | 1.30 | 1.00 | 2.88 |
| Galactin-1                                                 | LGALS1    | P09382  | ECM-affiliated         | ECM-affiliated | 2.62                                     | 0.99        | 1.84        | 2.06      | 0.98 | 1.44 | 2.01 |
| Mimcan/Osteoglycin                                         | OGN       | P20774  | ECM-affiliated         | Proteoglycan   | 0.57                                     | 0.98        | 0.94        | 1.13      | 0.90 | 0.79 | 1.93 |
| Collagen alpha-1(XII) chain                                | COL12A1   | Q99715  | FACIT Collagen         | Collagen       | 7.26                                     | 0.19        | 2.12        | 1.65      | 0.73 | 1.30 | 1.25 |
| Collagen alpha-1(XIV) chain                                | COL14A1   | Q05707  | FACIT Collagen         | Collagen       | 3.06                                     | 1.12        | 4.32        | 3.80      | 0.73 | 3.77 | 2.83 |
| Collagen alpha-2(I) chain(C-term Propeptide)               | COL1A2*   | P08123  | Fibrillar Collagen     | Collagen       | 6.14                                     | 0.92        | 3.25        | 8.78      | 1.00 | 5.78 | 1.54 |
| Collagen alpha-1(I) chain(C-term Propeptides (NC1 Domai    | COL1A1*   | P02452  | Fibrillar Collagen     | Collagen       | 5.03                                     | 0.76        | 2.97        | 6.42      | 0.84 | 6.59 | 1.36 |
| Collagen alpha-2(I) chain(C-term Propeptide)               | COL1A2*   | P08123  | Fibrillar Collagen     | Collagen       | 8.76                                     | 0.69        | 4.61        | 11.70     | 1.30 | 6.86 | 1.58 |
| Collagen alpha-1(I) chain                                  | COL1A1    | P02452  | Fibrillar Collagen     | Collagen       | 0.76                                     | 0.77        | 0.76        | 1.11      | 1.03 | 0.93 | 0.87 |
| Collagen alpha-2(I) chain                                  | COL1A2    | P08123  | Fibrillar Collagen     | Collagen       | 0.83                                     | 0.74        | 0.80        | 1.14      | 0.93 | 1.01 | 0.98 |
| Collagen alpha-1(V) chain                                  | COL5A1    | P20908  | Fibrillar Collagen     | Collagen       | 1.08                                     | 0.83        | 0.95        | 1.14      | 1.00 | 1.31 | 0.87 |
| Collagen alpha-2(V) chain                                  | COL5A2    | P05997  | Fibrillar Collagen     | Collagen       | 1.26                                     | 0.82        | 0.98        | 1.35      | 1.08 | 1.14 | 1.00 |
| Collagen alpha-1(III) chain                                | COL3A1    | P02461  | Fibrillar Collagen     | Collagen       | 0.91                                     | 0.79        | 0.93        | 1.26      | 0.89 | 1.35 | 0.78 |
| Tenascin-C(Iso1,2,3,4,5)                                   | TNC*      | P24821  | Matricellular          | Glycoprotein   | 4.51                                     | 0.23        | 1.17        | 1.07      | 1.19 | 0.67 | 3.79 |
| Fibulin 5                                                  | FBLN5     | Q9VVH8  | Matricellular          | Glycoprotein   | 4.23                                     | 0.68        | 2.92        | 3.11      | 0.69 | 1.80 | 2.83 |
| Perostin                                                   | POSTN     | Q62009  | Matricellular          | Glycoprotein   | 4.86                                     | 0.33        | 2.19        | 2.25      | 0.87 | 1.44 | 2.48 |
| Secreted protein, acidic, cysteine-rich (osteonectin)      | SPARC     | P09486  | Matricellular          | Glycoprotein   |                                          | Normal Only |             |           |      |      |      |
| Thrombospondin 1                                           | THBS1     | P07996  | Matricellular          | Glycoprotein   | 1.14                                     | 0.66        | 0.30        | 0.91      | 1.17 | 0.50 | 1.77 |
| Thrombospondin 2                                           | THBS2     | P35442  | Matricellular          | Glycoprotein   | eECM Only                                |             | eECM Only   |           |      |      |      |
| Tenascin-X                                                 | TNXB      | P22105  | Matricellular          | Glycoprotein   | 1.66                                     | 0.61        | 0.65        | 1.18      | 0.90 | 0.73 | 2.59 |
| Histone 2A(H2A-A-K)                                        | H2A*      | Q96QV6  | Other Cellular         | Cellular       | 2.59                                     | 0.59        | 1.54        | 1.68      | 1.06 | 1.28 | 1.83 |
| Histone H1(H1.1,H1.2,H1.3,H1.4)                            | H1*       | P16403  | Other Cellular         | Cellular       | 2.01                                     | 0.52        | 1.42        | 1.33      | 1.35 | 0.61 | 1.36 |
| Alpha-gamma-enolase                                        | ENO1/2    | P09104  | Other Cellular         | Cellular       |                                          | Normal Only |             |           |      |      |      |
| Glyceraldehyde-3-phosphate dehydrogenase                   | GAPDH     | P04406  | Other Cellular         | Cellular       | 0.64                                     | 0.48        | 1.07        | 1.71      | 0.56 | 1.40 | 0.59 |
| Transforming growth factor-beta-induced protein lg-h3      | TGFB1     | Q15582  | Secreted               | Glycoprotein   | 1.95                                     | 0.63        | 1.00        | 1.18      | 0.76 | 0.66 | 3.21 |
| Collagen alpha-1(VII) chain(Fibronectin type-III 3 Domain) | COL7A1*   | Q63870  | Microfibril-Associated | Collagen       | 2.28                                     | 0.38        | Normal Only | 2.38      | 1.23 | 0.49 | 1.55 |
| Fibronectin 1(type-III 3/4/7/9/13 domain)                  | FN1       | P02751  | Microfibril-Associated | Glycoprotein   | 3.91                                     | 0.84        | 2.14        | 3.12      | 1.05 | 1.76 | 2.10 |
| Latent transforming growth factor beta binding protein 1   | LTBP1*    | Q14766  | Microfibril-Associated | Glycoprotein   | eECM Only                                |             | eECM Only   | eECM Only |      |      |      |
| Biglycan                                                   | BGN       | P21810  | Microfibril-Associated | Proteoglycan   | 4.18                                     | 0.58        | 1.82        | 2.46      | 1.25 | 1.40 | 1.41 |
| Chondroadherin                                             | CHAD      | O15335  | Microfibril-Associated | Proteoglycan   |                                          | eECM Only   |             |           |      |      |      |
| Collagen alpha-1(XVII) chain                               | COL17A1   | Q9UMD9  | Microfibril-Associated | Collagen       | 0.69                                     | 0.32        | 0.19        | 1.04      | 0.91 | 0.53 | 1.27 |
| Collagen alpha-1(XVIII) chain                              | COL18A1   | P39060  | Microfibril-Associated | Collagen       | 2.22                                     | 1.03        | 1.78        | 1.62      | 0.99 | 1.34 | 1.32 |
| Collagen alpha-1(VI) chain                                 | COL6A1    | P12109  | Microfibril-Associated | Collagen       | 2.37                                     | 0.89        | 1.28        | 1.79      | 1.16 | 1.37 | 2.39 |
| Collagen alpha-2(VI) chain                                 | COL6A2    | P12110  | Microfibril-Associated | Collagen       | 2.17                                     | 0.68        | 1.38        | 2.52      | 1.05 | 1.28 | 2.13 |
| Collagen alpha-3(VI) chain                                 | COL6A3    | P12111  | Microfibril-Associated | Collagen       | 2.36                                     | 0.88        | 1.19        | 1.65      | 1.04 | 1.31 | 1.97 |
| Decorin                                                    | DCN       | Q01129  | Microfibril-Associated | Proteoglycan   | 0.59                                     | 0.69        | 0.61        | 1.18      | 1.01 | 0.85 | 1.37 |
| Dermatopontin                                              | DPT       | Q07507  | Microfibril-Associated | Glycoprotein   | 0.88                                     | 0.91        | 0.77        | 1.41      | 0.89 | 0.95 | 1.14 |
| Fibulin 3                                                  | EFEMP1    | Q12805  | Microfibril-Associated | Glycoprotein   | 2.99                                     | 0.81        | 3.43        | 1.80      | 0.73 | 1.51 | 2.70 |
| Fibulin 4                                                  | EFEMP2    | Q5X184  | Microfibril-Associated | Glycoprotein   | 2.07                                     | 0.90        | 3.10        | 1.54      | 0.98 | 1.17 | 1.60 |
| Emilin 1                                                   | EMILIN1   | Q9VC62  | Microfibril-Associated | Glycoprotein   | 2.21                                     | 1.12        | 2.31        | 1.70      | 0.88 | 1.18 | 1.85 |
| Fibulin 1                                                  | FBLN1     | P23142  | Microfibril-Associated | Glycoprotein   | 2.20                                     | 0.94        | 2.45        | 2.00      | 0.93 | 1.60 | 2.40 |
| Fibrillin 1                                                | FBN1      | Q61554  | Microfibril-Associated | Glycoprotein   |                                          | Normal Only |             |           |      |      |      |
| Fibromodulin                                               | FMOD      | Q06828  | Microfibril-Associated | Proteoglycan   | 0.44                                     | 0.65        | 0.59        | 1.65      | 0.65 | 1.28 | 1.17 |
| Fibronectin 1                                              | FN1       | P02751  | Microfibril-Associated | Glycoprotein   | 0.33                                     | 1.19        | 0.31        | 7.05      | 0.86 | 1.19 | 2.72 |
| Lumican                                                    | LUM       | P51885  | Microfibril-Associated | Proteoglycan   | 1.02                                     | 0.84        | 1.00        | 1.27      | 1.07 | 0.95 | 1.36 |
| Microfibrillar-associated protein 2                        | MFAP2     | P55001  | Microfibril-Associated | Glycoprotein   | 3.33                                     | 0.88        | 1.69        | 1.98      | 0.94 | 1.66 | 1.85 |
| Prolargin                                                  | PRELP     | Q9JK53  | Microfibril-Associated | Proteoglycan   | 0.37                                     | 0.94        | 0.85        | 1.22      | 1.02 | 0.93 | 1.40 |
| Osteopontin                                                | SPP1      | P10923  | Microfibril-Associated | Glycoprotein   | 0.98                                     | 0.04        | 1.01        | 0.99      | 0.92 | 0.97 | 1.00 |
| Versican                                                   | VCAN      | P13611  | Microfibril-Associated | Proteoglycans  | 2.80                                     | 0.97        | 1.75        | 4.64      | 1.28 | 2.29 | 3.71 |
| Vitronectin                                                | VTN       | Q32B57  | Microfibril-Associated | Glycoprotein   | 1.93                                     | 1.29        | 1.39        | 1.55      | 1.09 | 1.67 | 1.50 |

**Table S2. Quantitative proteomics of canine distal and normal tissue. Absolute quantification of proteins (nmol/g), shown as a ratio of distal/normal within each dog for eECM treatment animals (n=6) and control (n=1). Proteins are separated by gene ontology class and**



labeled by their matrisome classification. Red represents highly expressed proteins in the distal remodeled tissue, and blue represents highly expressed proteins in the normal tissue.
